# Supplementary material for: Lipid biomarker-based sea (sub)surface temperature record offshore Tasmania over the last 23 million years
Source: Copernicus journal article supplement (doi:10.5194/cp-2022-79), 2022-10-04

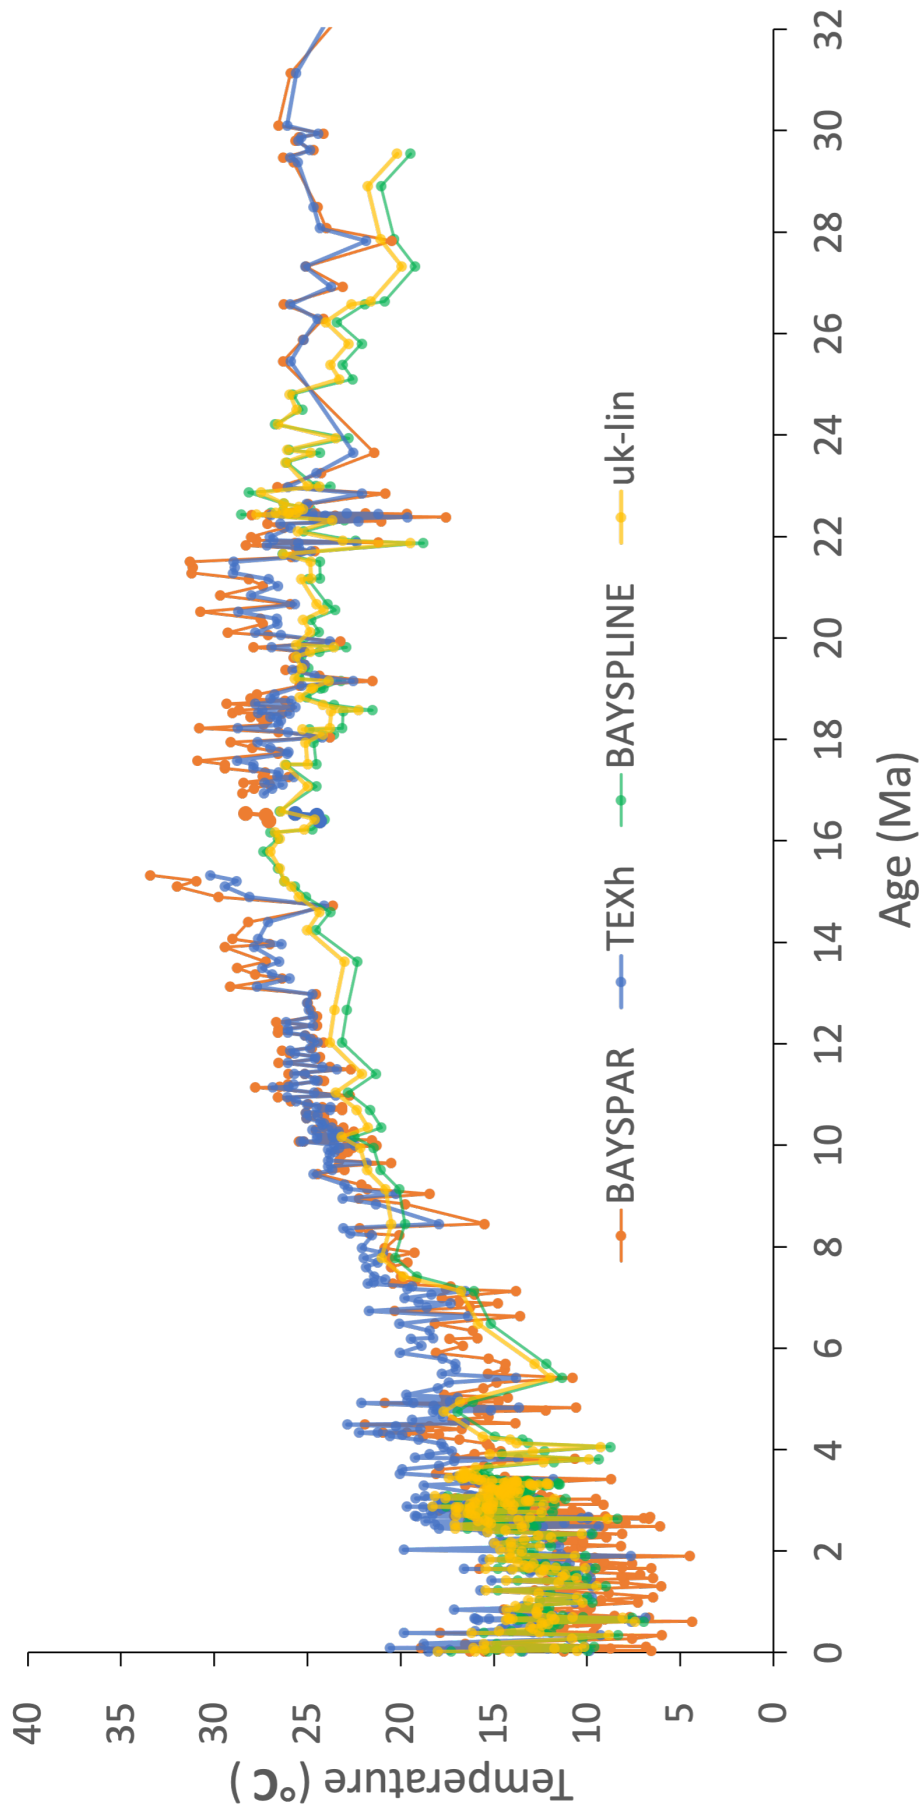

Supplement: Supplementary file [file cp-2022-79-AC1-supplement.pdf]
